# Supplementary material
Source: MDPI journal article supplement (https://www.mdpi.com/2073-445X/11/9/1535)
Supplement: s1 [file s1]

**Table S1 - Characterization of fertility under continuous crops and pasture–crop systems with two levels of fertilization, and Cerrado reference plot the experimental area (0 -10 and10-20 cm).**

| Treatments     | Depth | Al<br>cmolc.<br>dm <sup>-3</sup> | Ca<br>cmolc.<br>dm <sup>-3</sup> | Mg<br>cmolc.<br>dm <sup>-3</sup> | H+ Al<br>cmolc.<br>dm <sup>-3</sup> | pH<br>(H <sub>2</sub> O) | K<br>g kg <sup>-1</sup> | P<br>g kg <sup>-1</sup> | OM<br>g kg <sup>-1</sup> |
|----------------|-------|----------------------------------|----------------------------------|----------------------------------|-------------------------------------|--------------------------|-------------------------|-------------------------|--------------------------|
| <b>CC-F1</b>   | 0-10  | 0.04                             | 4.06                             | 0.10                             | 3.42                                | 5.65                     | 111.25                  | 3.82                    | 4.06                     |
|                | 10-20 | 0.62                             | 0.60                             | 0.10                             | 5.93                                | 5.41                     | 49.25                   | 8.67                    | 2.20                     |
| <b>CC-F2</b>   | 0-10  | 0.02                             | 5.49                             | 0.30                             | 3.61                                | 5.51                     | 139.00                  | 7.82                    | 4.59                     |
|                | 10-20 | 0.20                             | 1.56                             | 0.30                             | 5.62                                | 5.62                     | 78.75                   | 8.88                    | 2.34                     |
| <b>ICL-F1</b>  | 0-10  | 0.03                             | 3.56                             | 0.50                             | 4.06                                | 5.35                     | 108.00                  | 12.31                   | 3.78                     |
|                | 10-20 | 0.20                             | 1.08                             | 0.10                             | 5.70                                | 5.66                     | 53.00                   | 2.59                    | 2.60                     |
| <b>ICL-F2</b>  | 0-10  | 0.03                             | 5.37                             | 0.60                             | 3.07                                | 5.55                     | 169.75                  | 13.87                   | 3.59                     |
|                | 10-20 | 0.14                             | 2.29                             | 0.20                             | 4.69                                | 5.67                     | 55.50                   | 3.33                    | 3.13                     |
| <b>Cerrado</b> | 0-10  | 0.70                             | 0.50                             | 0.30                             | 9.10                                | 4.80                     | 58.0                    | 1.70                    | 4.22                     |
|                | 10-20 | 0.50                             | 0.00                             | 0.10                             | 7.20                                | 4.90                     | 31.0                    | 1.20                    | 2.14                     |

Determinations made according to Embrapa (1997) Manual of soil analysis. Al and H + Al Titration, Ca and Mg by Atomic adsorption spectroscopy, K by flame photometry and P (Mehlich I) by colorimetry.
