# Supplementary material
Source: MDPI journal article supplement (https://www.mdpi.com/2073-445X/11/9/1535)
Supplement: s1 [file s1 › Figure S1.pdf]

70° W 60° W 50° W 40° W

# LEGEND

- State limits of Brazil
- Biome:
- Amazon Rainforest
  - Caatinga
  - Cerrado
  - Atlantic Rainforest
  - Pampa
  - Pantanal

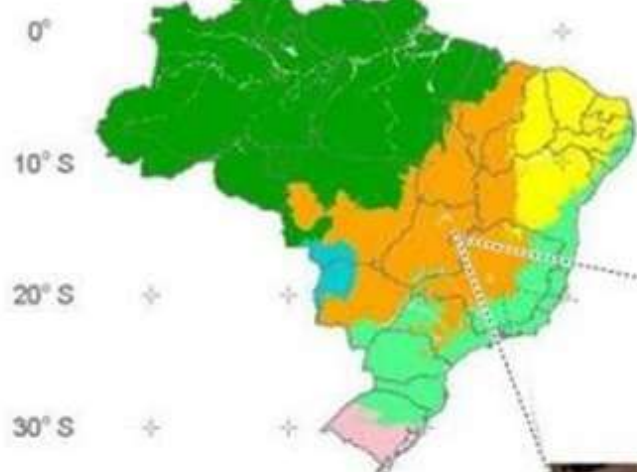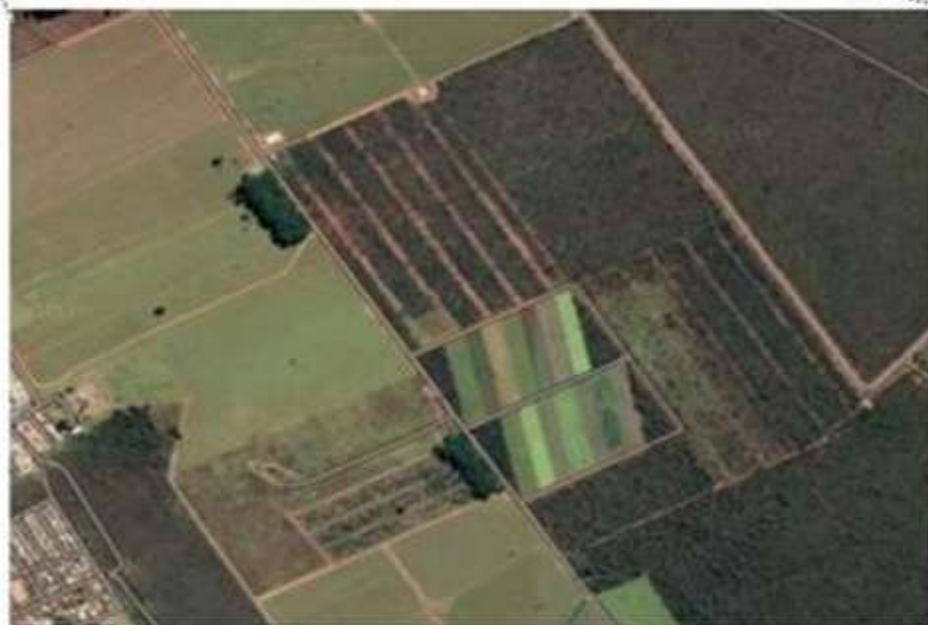

image taken from Google Earth
