# Supplementary material
Source: MDPI journal article supplement (https://www.mdpi.com/2073-445X/11/9/1535)
Supplement: s1 [file s1 › Table S3.pdf]

**Table S3** - Levels of correctives and nutrients applied between 1991 and 2013 in the field experiment.

| <b>Treatments</b> | <b>Lime/<br/>mg ha<sup>-1a</sup></b> | <b>Gypsum/<br/>mg ha<sup>-1b</sup></b> | <b>N</b> | <b>P<br/>kg ha<sup>1</sup></b> | <b>K<br/>kg ha<sup>1</sup></b> |
|-------------------|--------------------------------------|----------------------------------------|----------|--------------------------------|--------------------------------|
| <b>ICL-F1</b>     | 7.15                                 | 1.5                                    | 365      | 510                            | 682                            |
| <b>ICL-F2</b>     | 10.6                                 | 4.3                                    | 545      | 923                            | 1395                           |
| <b>CC-F1</b>      | 7.15                                 | 1.5                                    | 365      | 510                            | 682                            |
| <b>CC-F2</b>      | 10.6                                 | 4.3                                    | 545      | 923                            | 1395                           |

ICL-F1: integrated crop-livestock with half of the recommended P and K rates; ICL-F2: integrated crop- livestock with the recommended P and K rates; CC-F1: Continuous crop with half of the recommended Pand K rates; CC-F2: continuous crop with the recommended P and K rates.

<sup>a</sup>= Dolomitic lime, <sup>b</sup>=Humidity content 22.6%
