# Supplementary material
Source: MDPI journal article supplement (https://www.mdpi.com/2073-445X/11/9/1535)
Supplement: s1 [file s1 › Table S4.pdf]

**Table S4-** Soil chemical attributes in the treatments with different managements and fertilization.

| Treatments | Al<br>cmolc.<br>dm <sup>-3</sup> | Ca<br>cmolc.<br>dm <sup>-3</sup> | pH (H <sub>2</sub> O) | K<br>g kg <sup>-1</sup> | P<br>g kg <sup>-1</sup> | OM<br>g kg <sup>-1</sup> |
|------------|----------------------------------|----------------------------------|-----------------------|-------------------------|-------------------------|--------------------------|
| 0 - 10 cm  |                                  |                                  |                       |                         |                         |                          |
| CC-F1      | 0.04 A                           | 4.06 B                           | 5.65 A                | 111.25 B                | 3.82 A                  | 4.06 AB                  |
| CC-F2      | 0.02 A                           | 5.49 A                           | 5.51 AB               | 139.00 B                | 7.82 A                  | 4.59 A                   |
| ICL-F1     | 0.03 A                           | 3.56 B                           | 5.35 B                | 108.00 B                | 12.31 A                 | 3.78 B                   |
| ICL-F2     | 0.03 A                           | 5.37A                            | 5.55 A                | 169.75 A                | 13.87 A                 | 3.59 B                   |
| SE         | 0.018                            | 0.34                             | 0.06                  | 12.85                   | 3.87                    | 0.25                     |
| 10 - 20 cm |                                  |                                  |                       |                         |                         |                          |
| CC-F1      | 0.62 A                           | 0.60 B                           | 5.41 B                | 49.25 B                 | 8.67 A                  | 2.20 B                   |
| CC-F2      | 0.20 B                           | 1.56 AB                          | 5.62 AB               | 78.75 A                 | 8.88 A                  | 2.34 B                   |
| ICL-F1     | 0.29 B                           | 1.08 B                           | 5.66 AB               | 53.00 B                 | 2.59 A                  | 2.60 AB                  |
| ICL-F2     | 0.14 B                           | 2.29 A                           | 5.67 A                | 55.50 B                 | 3.33 A                  | 3.13 A                   |
| SE         | 0.06                             | 0.40                             | 0.08                  | 5.91                    | 2.20                    | 0.26                     |
| 20 – 30 cm |                                  |                                  |                       |                         |                         |                          |
| CC-F1      | 0.21 B                           | 0.37 B                           | 5.23 B                | 31.25 AB                | 2.25 A                  | 2.23 A                   |
| CC-F2      | 0.40 A                           | 0.75 B                           | 5.33 AB               | 46.75 A                 | 2.77 A                  | 2.25 A                   |
| ICL-F1     | 0.30 AB                          | 0.60 B                           | 5.50 AB               | 28.50 B                 | 0.82 B                  | 2.21 A                   |
| ICL-F2     | 0.21 B                           | 1.14 AB                          | 5.61 A                | 38.00 AB                | 1.07 B                  | 2.35 A                   |
| SE         | 0.04                             | 0.25                             | 0.10                  | 5.52                    | 0.28                    | 0.23                     |

ICL-F1: integrated crop-livestock with half of the recommended P and K rates; ICL-F2: integrated crop-livestock with the recommended P and K rates; CC-F1: Continuous crop with half of the recommended P and K rates; CC-F2: continuous crop with the recommended P and K rates. Means followed by the same letters for each soil attribute, do not differ from each other, by the test Tukey-Kramer (P<0.05).

SE = Standard error
