# Supplementary material
Source: MDPI journal article supplement (https://www.mdpi.com/2073-445X/11/9/1535)

Beginning of N<sub>2</sub>O measurements

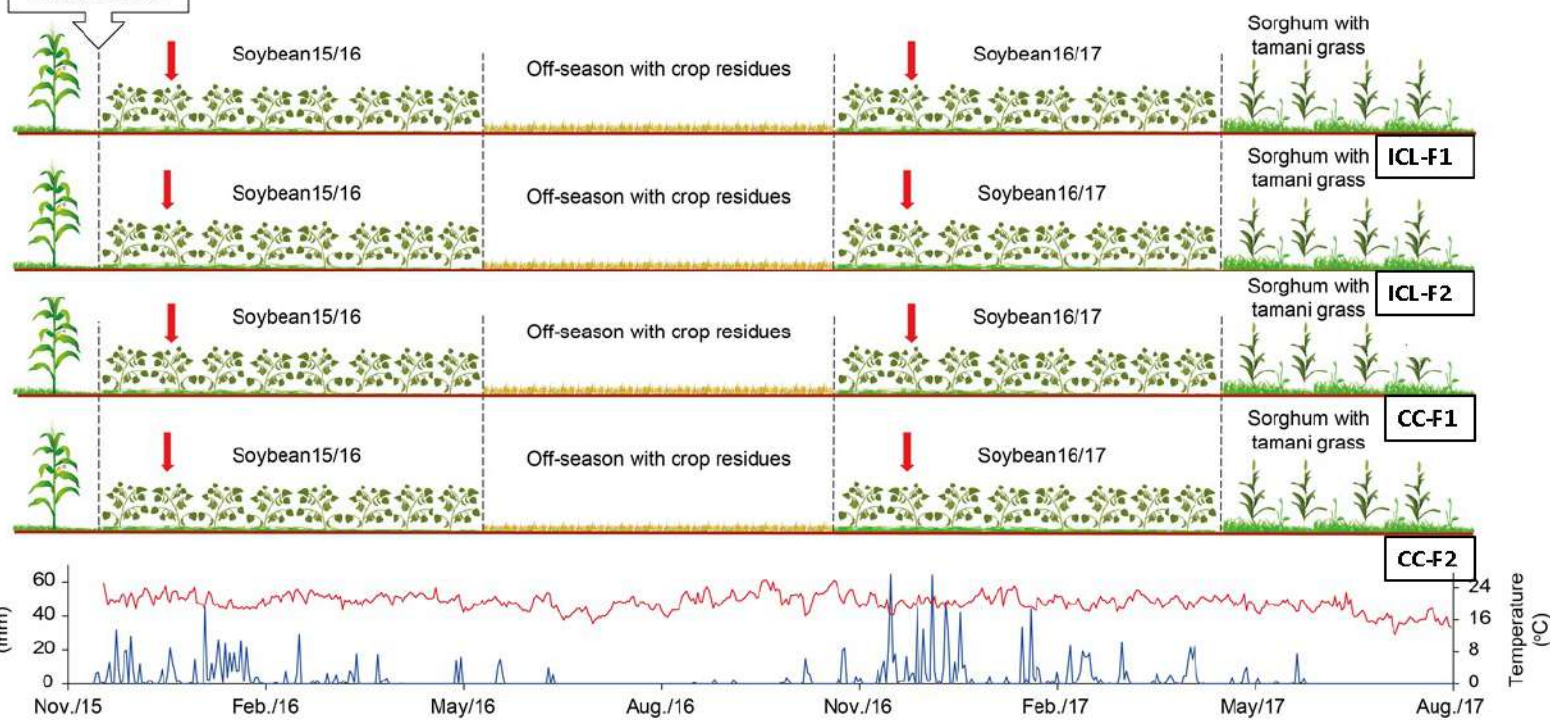

Supplement: s1 [file s1]

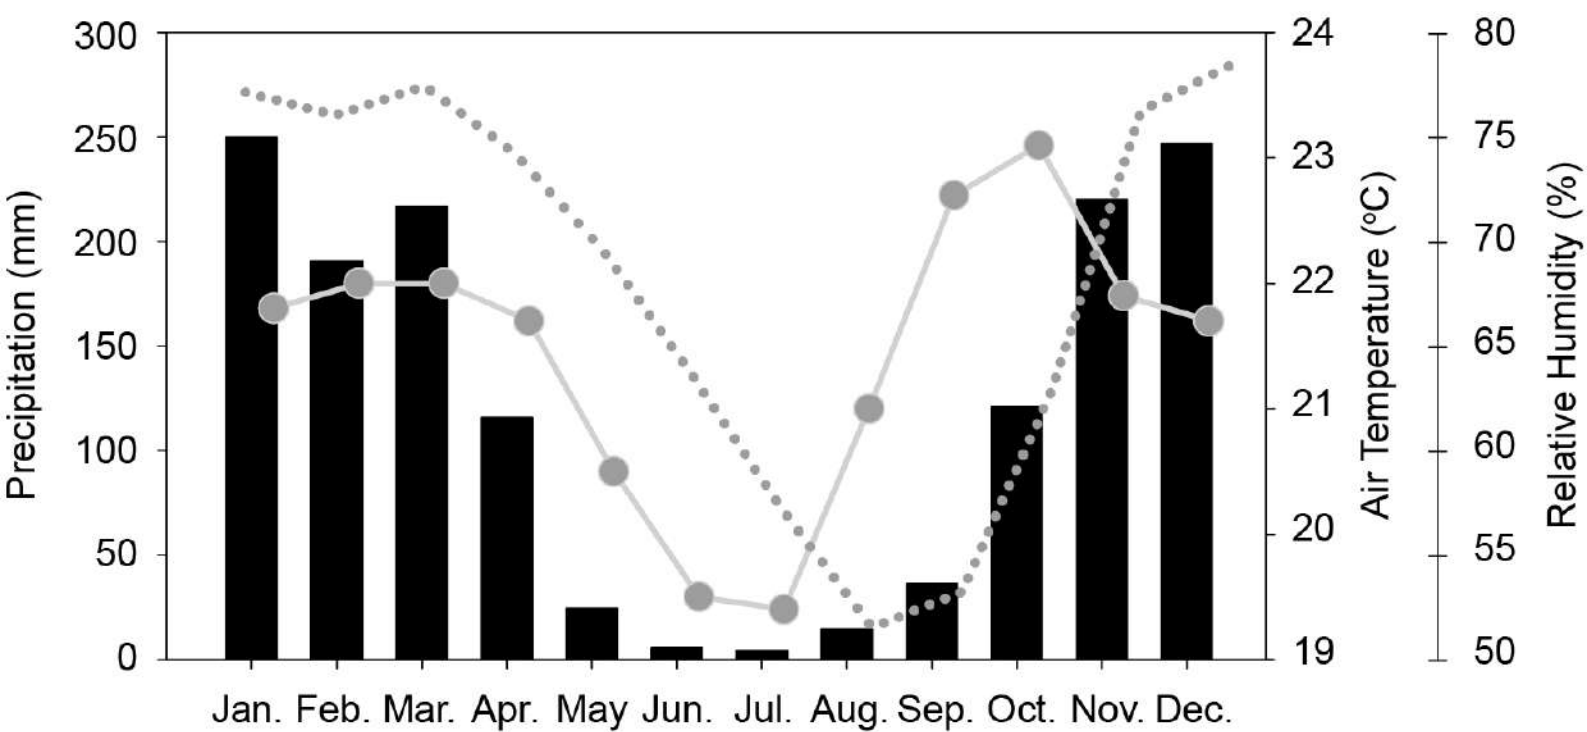

Supplement: s1 [file s1]
